# Supplementary material for: Antibiotic Susceptibility Testing (AST) Reports: A Basis for Environmental/Epidemiological Surveillance and Infection Control Amongst Environmental Vibrio cholerae
Source: Int J Environ Res Public Health. 2020 Aug 6;17(16):5685. doi: 10.3390/ijerph17165685 (PMC7460427; doi:10.3390/ijerph17165685)
Supplement: Supplementary file 1 [file ijerph-17-05685-s001.pdf]

## Supplementary Figures SI 1 – SI 13

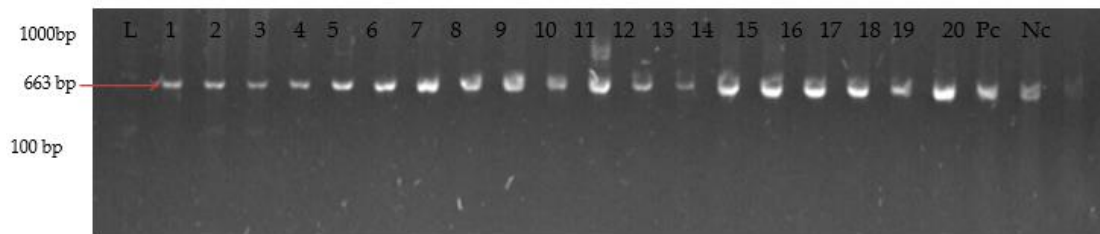

**Figure SI 1.** Gel photo of the Genus specific *16SrRNA* gene detection L represents a molecular marker of 1.2kb, Pc is a positive control *DSM 19130 V. cholerae*, Nc is a negative control *DSM 8224 Plesiomonas shigelloides*, while numbers 1-20 are positive isolates.

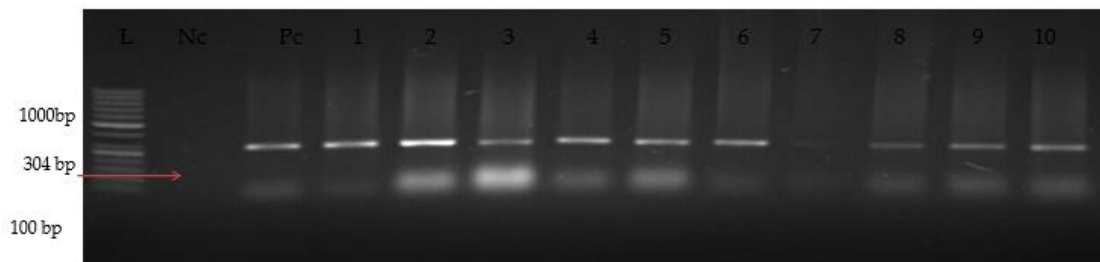

**Figure SI 2.** Photomicrogram of *OmpW* gene detection, L represents a molecular marker of 1.2kb, Pc is a positive control *DSM 19130 V. cholerae*, Nc is a negative control *DSM 8224 Plesiomonas shigelloides*, while numbers 1-10 are positive isolates.

## Antibiotic Resistant and Resistance Associated Genes

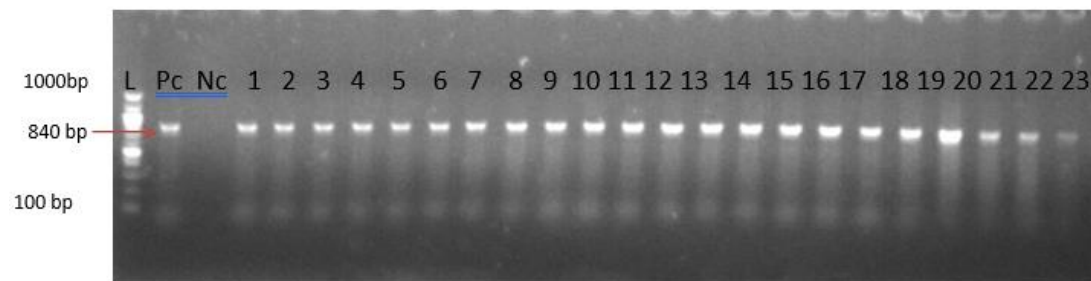

**Figure SI 3.** Photomicrogram of *blaTEM* resistant gene detection at 840 bp, L represents a molecular marker of 1.2kb, Pc is a positive control *DSM 19130 V. cholerae*, Nc is a negative control *DSM 8224 Plesiomonas shigelloides*, while numbers 1-23 are positive isolates.

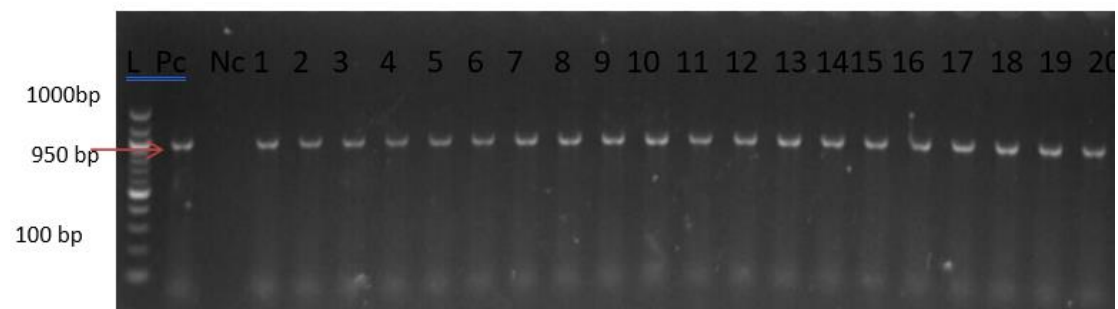

**Figure SI 4.** Photomicrogram of *tetA* resistant gene detection (950 bp), L represents a molecular marker of 1.2kb, Pc is a positive control *DSM 19130 V. cholerae*, Nc is a negative control *DSM 8224 Plesiomonas shigelloides*, while numbers 1-20 are positive isolates.

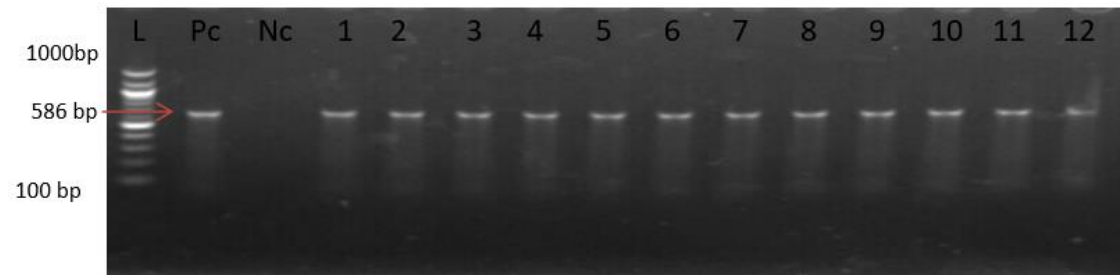

**Figure SI 5.** Photomicrogram of Flor resistant gene detection (586 bp), L represents a molecular marker of 1.2kb, Pc is a positive control DSM 19130 *V. cholerae*, Nc is a negative control DSM 8224 *Plesiomonas shigelloides*, while numbers 1-12 are positive isolates.

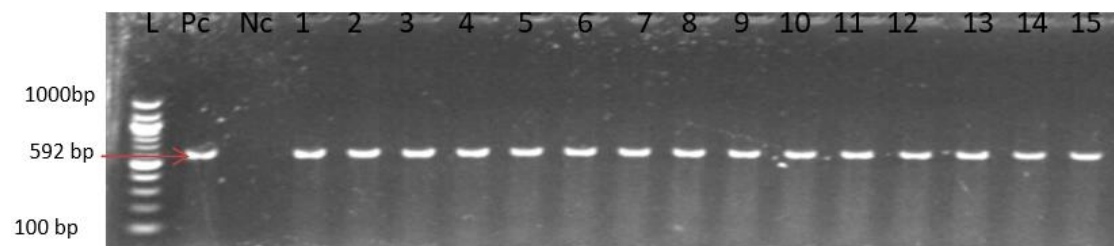

**Figure SI 6.** Photomicrogram of a rear integrase (INT1) gene detection (592 bp), L represents a molecular marker of 1.2kb, Pc is a positive control DSM 19130 *V. cholerae*, Nc is a negative control DSM 8224 *Plesiomonas shigelloides*, while numbers 1-15 are positive.

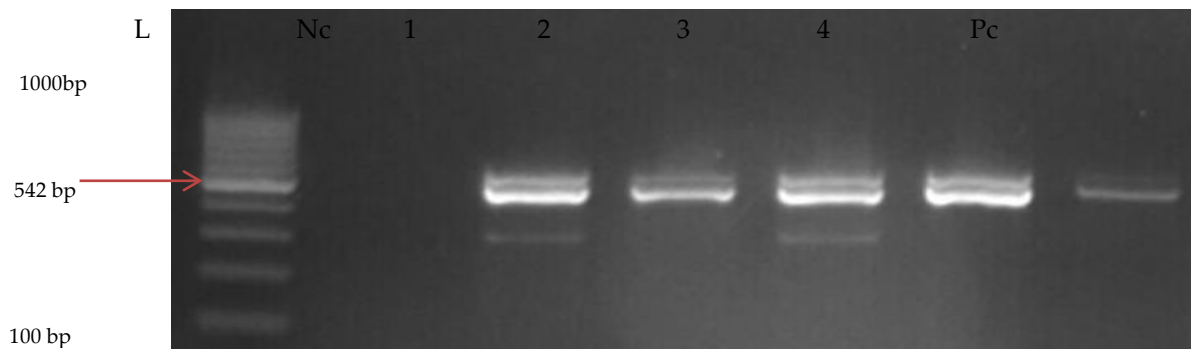

**Figure SI 7.** Photomicrogram of a chloramphenicol (catII) resistant gene detection (542 bp), L represents a molecular marker of 1.2kb, Pc is a positive control DSM 19130 *V. cholerae*, Nc is a negative control DSM 8224 *Plesiomonas shigelloides*, while numbers 1-4 are positive.

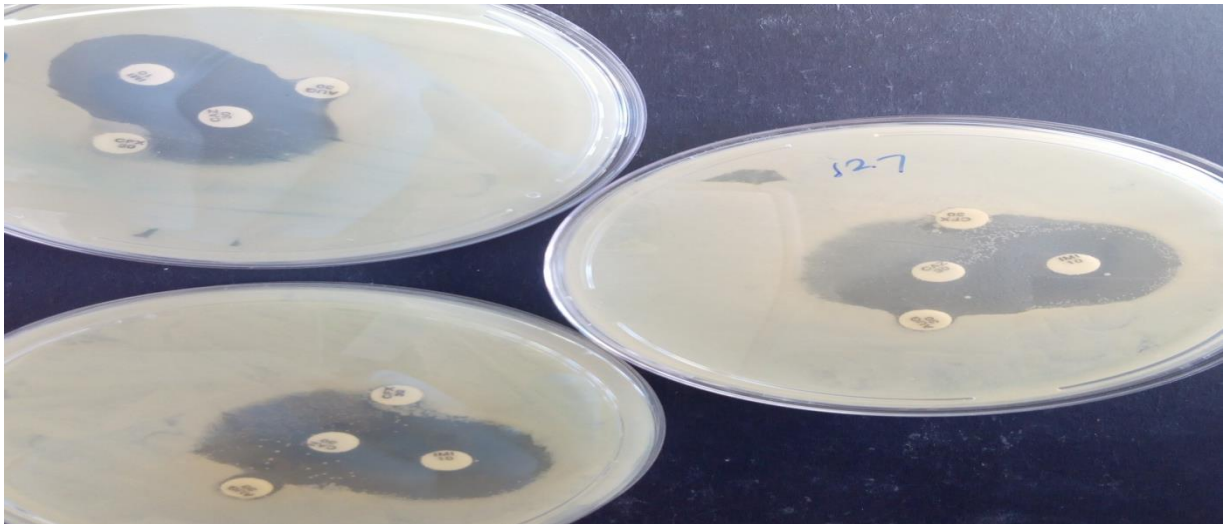

**Figure SI 8.** Photomicrogram of positive AmpC phenotype amongst isolates. An obvious blunting or flattening of the zone of inhibition between ceftazidime disk and other inducing antibiotics disks (imipenem, ceftioxin and amoxicillin-clavulanate)

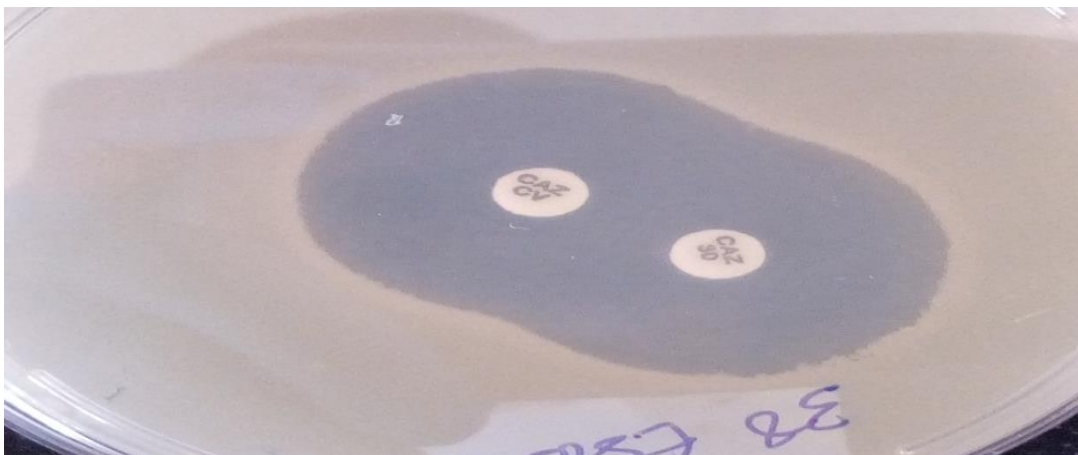

**Figure SI 9.** Photomicrogram of positive ESβLs phenotype amongst isolates. An observation of  $\geq 5$  mm increase in zone of inhibition diameter for Ceftazidime in the synergy test

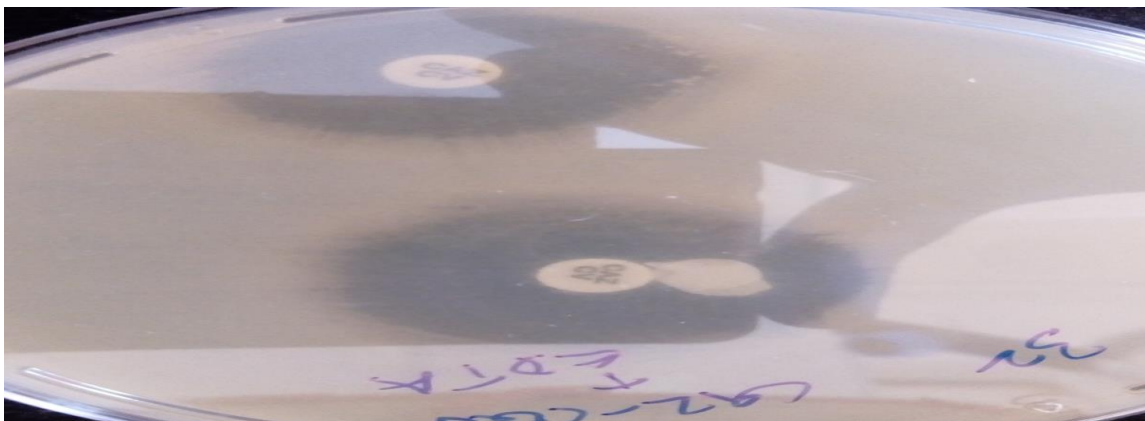

**Figure SI 10.** Photomicrogram of positive ESβLs phenotype amongst isolates. An observation of  $\geq 5$  mm increase in zone of inhibition diameter for Ceftazidime in the synergy test

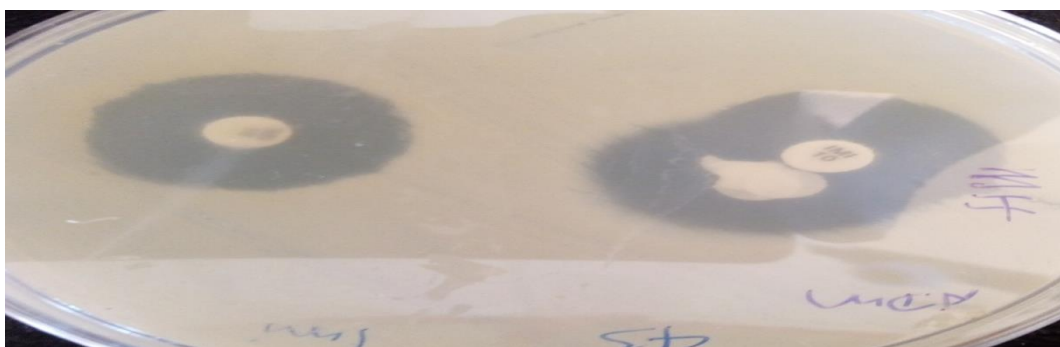

**Figure SI 11.** Photomicrogram of positive NDM phenotype amongst isolates. The observation of  $\geq 4$  mm zone of inhibition in the EDTA fortified disc is indicative of a carbapenemase producing isolate.

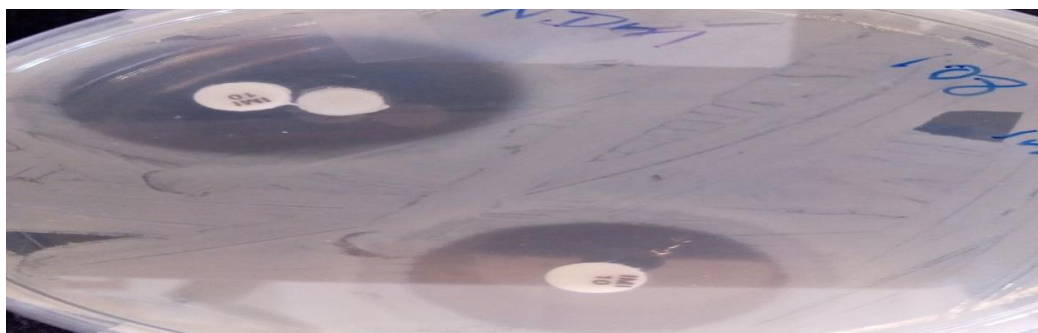

**Figure SI 12.** Photomicrogram of positive NDM phenotype amongst isolates. The observation of  $\geq 4$  mm zone of inhibition in the EDTA fortified disc is indicative of a carbapenemase producing isolate.

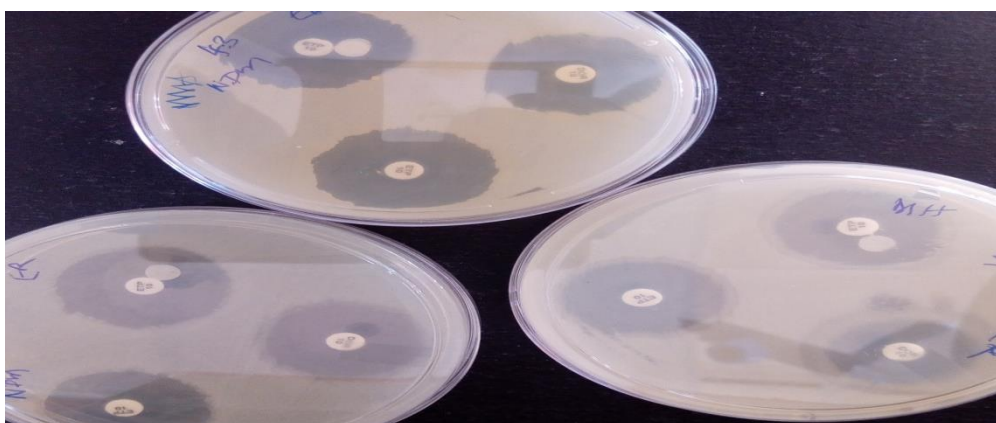

**Figure SI 13.** Photomicrogram of positive NDM phenotype amongst isolates. The observation of  $\geq 4$  mm zone of inhibition in the EDTA fortified disc is indicative of a carbapenemase producing isolate.
